# Supplementary figures and images for: Probing binding and allosteric mechanisms of the KRAS interactions with monobodies and affimer proteins: ensemble-based mutational profiling and thermodynamic analysis of binding energetics and allostery reveal diversity of functional hotspots and cryptic pockets linked by conserved communication network
Source: Royal Society of Chemistry journal article supplement (doi:10.1039/d5cp00966a), 2025-01-01

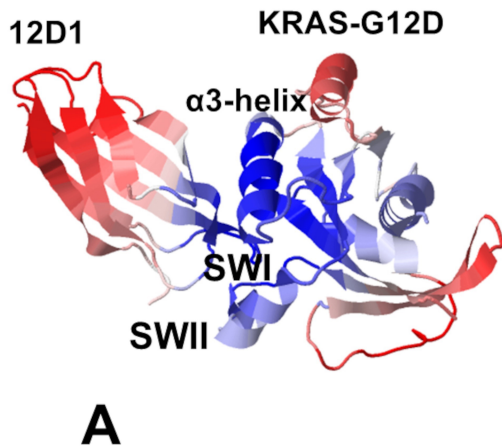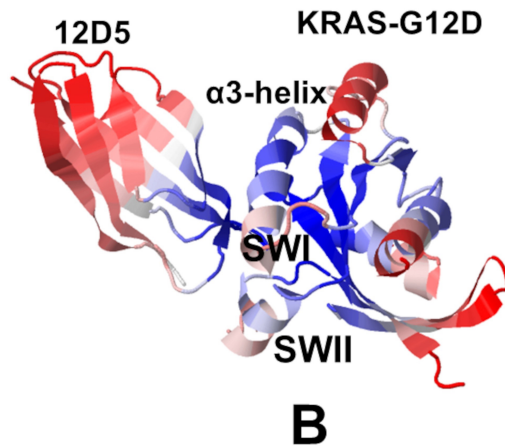

Supplement: d5cp00966a1.pdf [file d5cp00966a1.pdf]

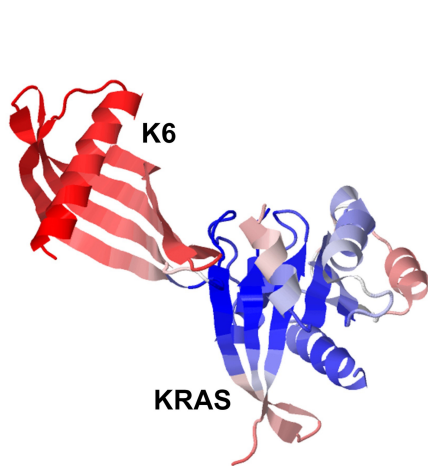

**A**

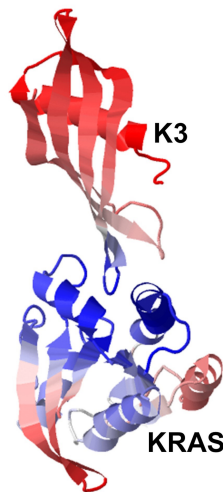

**B**

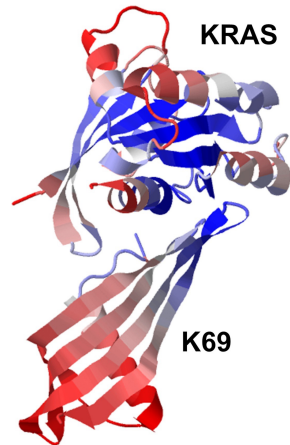

**C**

Supplement: d5cp00966a2.pdf [file d5cp00966a2.pdf]

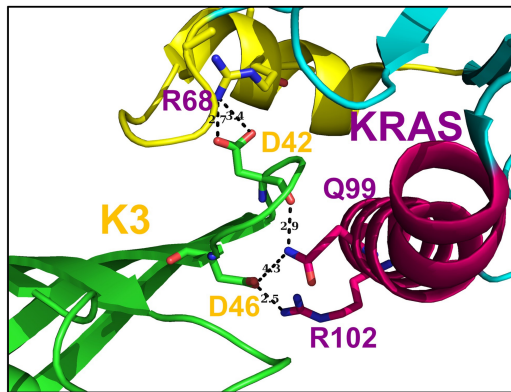

**A**

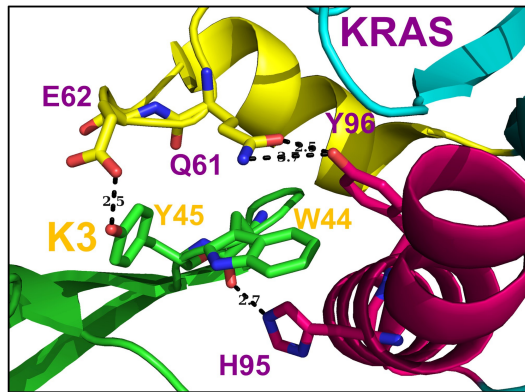

**B**

Supplement: d5cp00966a4.pdf [file d5cp00966a4.pdf]

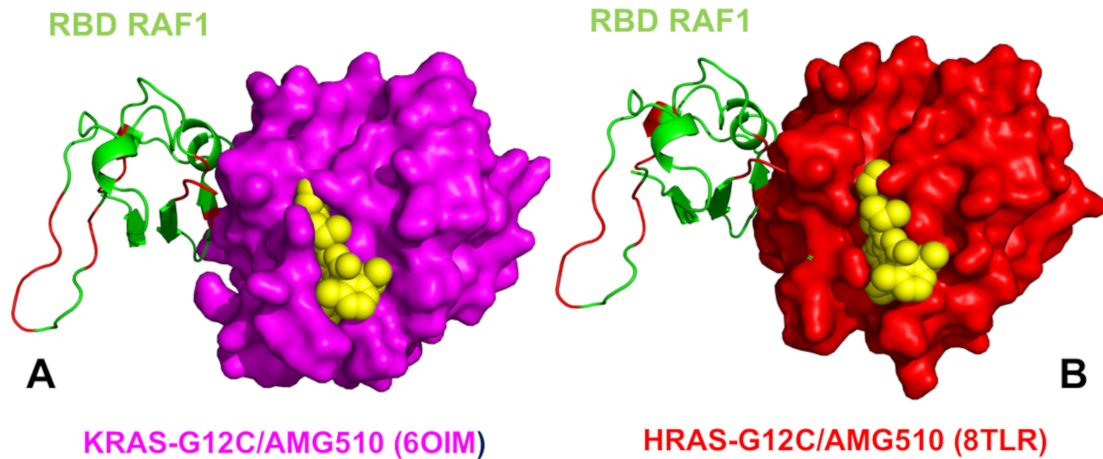

Supplement: d5cp00966a6.pdf [file d5cp00966a6.pdf]
